# Supplementary material for: Ammonium Ion Enhanced V2O5-WO3/TiO2 Catalysts for Selective Catalytic Reduction with Ammonia
Source: MDPI journal article supplement (doi:10.3390/nano11102677), 2021-10-12
Supplement: s1 [file s1]

# Supplementary Materials

## Ammonium Ion Enhanced $V_2O_5$ - $WO_3$ /TiO<sub>2</sub> Catalysts for Selective Catalytic Reduction with Ammonia

Min Seong Lee <sup>1,2,†</sup>, Sun-I Kim <sup>1,†</sup>, Bora Jeong <sup>1</sup>, Jin-Woo Park <sup>2,3</sup>, Taehyo Kim <sup>1</sup>, Jung Woo Lee <sup>2</sup>, Gibum Kwon <sup>4,\*</sup> and Duck Hyun Lee <sup>1,\*</sup>

<sup>1</sup> Green Materials & Processes R&D Group, Korea Institute of Industrial Technology, Ulsan, 44413, Korea

<sup>2</sup> Department of Materials Science & Engineering, Pusan National University, Busan 46241, Korea

<sup>3</sup> NANO. CO., Ltd., Sanju 37257, Korea

<sup>4</sup> Department of Mechanical Engineering, University of Kansas, Lawrence, Kansas 66045, USA

\* Correspondence to: dulee@kitech.re.kr (D.H.L.), gbkwon@ku.edu (G.K.)

† Both authors contributed equally to this work.

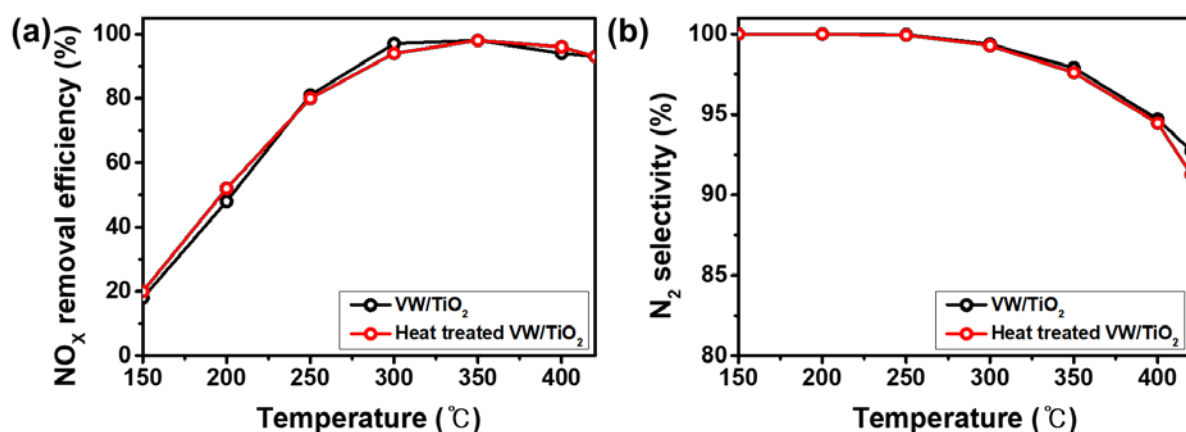

**Figure S1.** NO<sub>x</sub> removal efficiency (a) and N<sub>2</sub> selectivity (b) of V<sub>2</sub>O<sub>5</sub>–WO<sub>3</sub>/TiO<sub>2</sub> (black line) and heat-treated V<sub>2</sub>O<sub>5</sub>–WO<sub>3</sub>/TiO<sub>2</sub> without the silane coating process (red line). Reaction conditions: [NO] = 300 ppm, [NH<sub>3</sub>] = 300 ppm, [SO<sub>2</sub>] = 600 ppm, [O<sub>2</sub>] = 5 vol.%, and GHSV = 60,000 h<sup>-1</sup>. There was no significant differences in the NO<sub>x</sub> removal efficiency and N<sub>2</sub> selectivity between V<sub>2</sub>O<sub>5</sub>–WO<sub>3</sub>/TiO<sub>2</sub> and heat-treated V<sub>2</sub>O<sub>5</sub>–WO<sub>3</sub>/TiO<sub>2</sub> without the silane coating process in the temperature range of 150–420 °C. These results demonstrate that silane coating is a key process in preparing ammonium ion-enhanced V<sub>2</sub>O<sub>5</sub>–WO<sub>3</sub>/TiO<sub>2</sub> catalysts.

**Table S1.** Atomic percent of elements obtained from the XPS spectra of the heat-treated VW/TiO<sub>2</sub> catalyst without silane coating process.

| Sample                                                             | Elemental Composition (at. %) |       |    |   |       |      |      |      |       |
|--------------------------------------------------------------------|-------------------------------|-------|----|---|-------|------|------|------|-------|
|                                                                    | N                             | O     | Si | F | C     | S    | V    | W    | Ti    |
| VW/TiO <sub>2</sub>                                                | 0.40                          | 52.47 | -  | - | 18.28 | 0.53 | 1.55 | 1.82 | 24.95 |
| Heat-treated<br>VW/TiO <sub>2</sub><br>(without silane<br>coating) | 0.27                          | 55.27 | -  | - | 19.79 | 0.36 | 1.29 | 1.55 | 21.47 |

**Table S2.** X-ray fluorescence analysis of the commercial plate-type monoliths.

| Sample                          | Chemical Composition (wt. %) |                               |                 |                  |                                |      |
|---------------------------------|------------------------------|-------------------------------|-----------------|------------------|--------------------------------|------|
|                                 | TiO <sub>2</sub>             | V <sub>2</sub> O <sub>5</sub> | WO <sub>3</sub> | MoO <sub>3</sub> | Al <sub>2</sub> O <sub>3</sub> | CaO  |
| Commercial plate-type monoliths | 91.08                        | 1.88                          | 0.46            | 2.15             | 2.04                           | 1.41 |
